# Supplementary material
Source: PubMed Central journal article supplement (PMC6800095)
Supplement: NIHMS1052852-supplement-appendix.pdf [file NIHMS1052852-supplement-appendix.pdf]

**eAppendix. Speakers at the Workshop on the Prevention of Obesity in Infancy and Early Childhood, October 30-November 1, 2013, Bethesda, MD**

Amy Bentley, Ph.D., New York University  
Margaret Bentley, Ph.D., The University of North Carolina at Chapel Hill  
Leann Birch, Ph.D., The Pennsylvania State University  
Maureen Black, Ph.D., The University of Maryland  
Karen Bonuck, Ph.D., Albert Einstein College of Medicine  
Nancy Butte, Ph.D., Baylor College of Medicine  
Linda M. Collins, Ph.D., The Pennsylvania State University  
Sheila Gahagan, M.D., M.P.H., University of California–San Diego  
Matthew W. Gillman, M.D., S.M., Harvard Pilgrim Health Care Institute  
Laurence Grummer-Strawn, Ph.D., M.P.A., M.A., Centers for Disease Control and Prevention  
Nancy F. Krebs, M.D., University of Colorado Denver  
Julie Lumeng, M.D., University of Michigan  
Julie Menella, Ph.D., Monell Chemical Senses Center  
Mary Jo Messito, M.D., New York University Langone Medical Center  
Jodi Mindell, Ph.D., Saint Joseph’s University  
Emily Oken, M.D., Harvard Pilgrim Health Care Institute  
Ken Ong, Ph.D., Addenbrookes Hospital  
Ian M. Paul, M.D., M.Sc., The Pennsylvania State University  
Daniel Raiten, Ph.D., Eunice Kennedy Shriver National Institute of Child Health and Human Development  
Russell Rothman, M.D., Vanderbilt University  
Kristin Shutts, Ph.D., University of Wisconsin–Madison  
Cynthia A. Stifter, Ph.D., The Pennsylvania State University  
Elsie Taveras, M.D., M.P.H., Massachusetts General Hospital  
Dale Ulrich, Ph.D., University of Michigan  
Susan Yanovski, M.D., National Institute of Diabetes and Digestive and Kidney Diseases
